# Supplementary material for: The Orphan Gene dauerless Regulates Dauer Development and Intraspecific Competition in Nematodes by Copy Number Variation
Source: PubMed Central journal article supplement (PMC4473527; doi:10.1371/journal.pgen.1005146), 2015-06-18

**A**

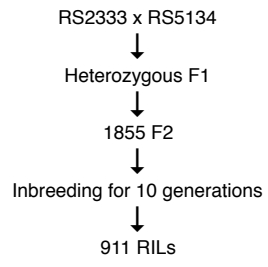

**B**

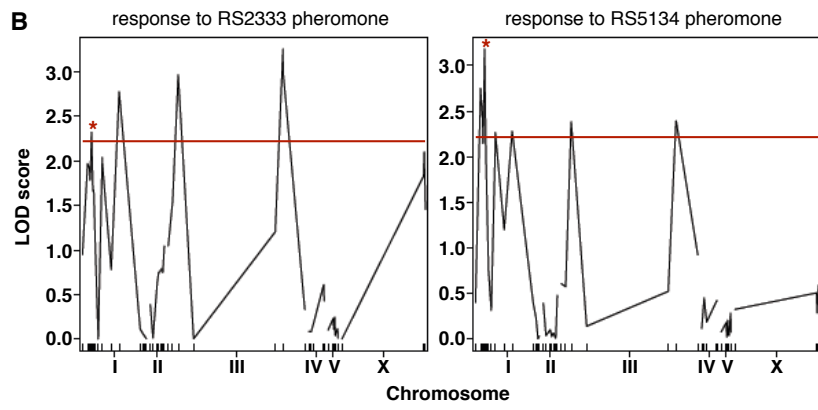

Supplement: pgen.1005146.s001.pdf [file pgen.1005146.s001.pdf]
